# Supplementary material for: Transcriptome Analysis Reveals the Mechanism of Exogenous Selenium in Alleviating Cadmium Stress in Purple Flowering Stalks (Brassica campestris var. purpuraria)
Source: MDPI journal article supplement (doi:10.3390/ijms25031800), 2024-02-01
Supplement: s1 [file s1]

**Table S2. Effects of selenium treatment on photosynthetic parameters of Purple Flowering Stalks exposed to Cadmium. Chlorophyll a content, Chlorophyll b content, Carotenoid content.**

| Treatments | Chlorophyll a content (mg g <sup>-1</sup> FW) |                 |                 |                 | Chlorophyll b content (mg g <sup>-1</sup> FW) |                     |                     |                 | Carotenoid content (mg g <sup>-1</sup> FW) |                 |                 |                 | Total chlorophyll content (mg g <sup>-1</sup> FW) |                 |                 |                     |
|------------|-----------------------------------------------|-----------------|-----------------|-----------------|-----------------------------------------------|---------------------|---------------------|-----------------|--------------------------------------------|-----------------|-----------------|-----------------|---------------------------------------------------|-----------------|-----------------|---------------------|
|            | 0d                                            | 3d              | 6d              | 9d              | 0d                                            | 3d                  | 6d                  | 9d              | 0d                                         | 3d              | 6d              | 9d              | 0d                                                | 3d              | 6d              | 9d                  |
| CK         | 2.84±<br>0.01 a                               | 3.63±<br>0.2 b  | 5.49±<br>0.25 a | 4.05±<br>0.32 a | 1.62±<br>0.05 a                               | 2.72±<br>0.15<br>ab | 3.60±<br>0.08 a     | 2.89±<br>0.22 a | 0.18±<br>0.02 a                            | 0.38±<br>0.03 c | 0.72±<br>0.06 a | 0.53±<br>0.04 a | 4.47±<br>0.04 a                                   | 6.34±<br>0.43 b | 9.09±<br>0.33 a | 6.94±<br>0.54 a     |
| CdCK       | 2.84±<br>0.01 a                               | 4.55±<br>0.33 a | 3.66±<br>0.31 c | 3.49±<br>0.10 a | 1.62±<br>0.05 a                               | 3.17±<br>0.35 a     | 2.53±<br>0.19 c     | 2.65±<br>0.18 a | 0.18±<br>0.02 a                            | 0.55±<br>0.03 b | 0.38±<br>0.03 c | 0.33±<br>0.02 b | 4.47±<br>0.04 a                                   | 7.75±<br>0.78 a | 6.19±<br>0.50 c | 5.61±<br>0.33 b     |
| CdSe       | 2.84±<br>0.01 a                               | 3.48±<br>0.14 b | 3.36±<br>0.30 c | 3.65±<br>0.38 a | 1.62±<br>0.05 a                               | 2.45±<br>0.26 b     | 2.66±<br>0.30<br>bc | 2.56±<br>0.23 a | 0.18±<br>0.02 a                            | 0.36±<br>0.03 c | 0.51±<br>0.01 b | 0.35±<br>0.01 b | 4.47±<br>0.04 a                                   | 5.74±<br>0.18 b | 6.25±<br>0.02 c | 6.21±<br>0.60<br>ab |
| Se         | 2.84±<br>0.01 a                               | 4.57±<br>0.24 a | 4.42±<br>0.10 b | 3.69±<br>0.29 a | 1.62±<br>0.05 a                               | 3.04±<br>0.15 a     | 2.98±<br>0.28 b     | 2.62±<br>0.15 a | 0.18±<br>0.02 a                            | 0.62±<br>0.01 a | 0.56±<br>0.02 b | 0.38±<br>0.03 b | 4.47±<br>0.04 a                                   | 7.62±<br>0.39 a | 7.71±<br>0.31 b | 6.31±<br>0.44<br>ab |
