# Supplementary material for: Transcriptome Analysis Reveals the Mechanism of Exogenous Selenium in Alleviating Cadmium Stress in Purple Flowering Stalks (Brassica campestris var. purpuraria)
Source: MDPI journal article supplement (doi:10.3390/ijms25031800), 2024-02-01
Supplement: s1 [file s1]

Table S3 Sequencing statistics of the transcriptome from four treatments of Purple Flowering Stalks

| Sam<br>ple | Raw<br>Read<br>s | Raw<br>Base<br>s(G) | Raw<br>Q30<br>(%) | Ra<br>w<br>GC(<br>%) | Clea<br>n<br>Read<br>s | Clea<br>n<br>Base<br>s(G) | Clea<br>n<br>Q30<br>(%) | Cle<br>an<br>GC<br>(%) | Effec<br>tive<br>Rate<br>(%) | total_<br>reads | total_ma<br>pped(%) | unique<br>(%)       | read1(%)            | read2(%)            | reads_map<br>_plus(%) | reads_map_<br>minus(%) |
|------------|------------------|---------------------|-------------------|----------------------|------------------------|---------------------------|-------------------------|------------------------|------------------------------|-----------------|---------------------|---------------------|---------------------|---------------------|-----------------------|------------------------|
| CK-<br>1   | 5724<br>1930     | 8.59                | 92.9<br>4         | 47.6<br>9            | 4979<br>1448           | 7.4                       | 96.4<br>4               | 47.<br>6               | 86.98                        | 49791<br>448    | 48196893<br>(96.80) | 4668915<br>0(96.87) | 23344578<br>(50.00) | 23344572<br>(50.00) | 23344575(5<br>0.00)   | 23344575(50<br>.00)    |
| CK-<br>2   | 6438<br>8976     | 9.66                | 94.3<br>8         | 47.7<br>9            | 5796<br>6918           | 8.57                      | 97.0<br>1               | 47.<br>68              | 90.03                        | 57966<br>918    | 56030441<br>(96.66) | 5428641<br>5(96.89) | 27143210<br>(50.00) | 27143205<br>(50.00) | 27143209(5<br>0.00)   | 27143206(50<br>.00)    |
| CK-<br>3   | 5447<br>0298     | 8.17                | 93.9<br>7         | 47.6<br>1            | 4852<br>6578           | 7.19                      | 96.8<br>8               | 47.<br>5               | 89.09                        | 48526<br>578    | 46864836<br>(96.58) | 4549677<br>8(97.08) | 22748391<br>(50.00) | 22748387<br>(50.00) | 22748388(5<br>0.00)   | 22748390(50<br>.00)    |
| CdC<br>K-1 | 5672<br>3202     | 8.51                | 94.1<br>8         | 47.6<br>2            | 5093<br>6414           | 7.55                      | 96.8<br>4               | 47.<br>52              | 89.8                         | 50936<br>414    | 49265813<br>(96.72) | 4783808<br>1(97.10) | 23919041<br>(50.00) | 23919040<br>(50.00) | 23919041(5<br>0.00)   | 23919040(50<br>.00)    |
| CdC<br>K-2 | 5485<br>4072     | 8.23                | 93.8<br>6         | 47.8<br>2            | 4885<br>1292           | 7.25                      | 96.7<br>1               | 47.<br>71              | 89.06                        | 48851<br>292    | 47150704<br>(96.52) | 4571849<br>8(96.96) | 22859250<br>(50.00) | 22859248<br>(50.00) | 22859249(5<br>0.00)   | 22859249(50<br>.00)    |
| CdC<br>K-3 | 5043<br>7904     | 7.57                | 93.5<br>1         | 47.8<br>2372         | 4443                   | 6.6                       | 96.7<br>3               | 47.<br>7               | 88.09                        | 44432<br>372    | 43043120<br>(96.87) | 4169092<br>2(96.86) | 20845462<br>(50.00) | 20845460<br>(50.00) | 20845460(5<br>0.00)   | 20845462(50<br>.00)    |
| CdS<br>e-1 | 5644<br>7566     | 8.47                | 94.4<br>4         | 47.5<br>1            | 5093<br>6534           | 7.55                      | 97<br>38                | 47.<br>38              | 90.24                        | 50936<br>534    | 48885497<br>(95.97) | 4756721<br>7(97.30) | 23783610<br>(50.00) | 23783607<br>(50.00) | 23783610(5<br>0.00)   | 23783607(50<br>.00)    |
| CdS<br>e-2 | 5925<br>5326     | 8.89                | 93.9<br>4         | 47.4<br>8            | 5278<br>5916           | 7.84                      | 96.8<br>3               | 47.<br>38              | 89.08                        | 52785<br>916    | 50875655<br>(96.38) | 4913536<br>1(96.58) | 24567681<br>(50.00) | 24567680<br>(50.00) | 24567681(5<br>0.00)   | 24567680(50<br>.00)    |
| CdS<br>e-3 | 5395<br>8948     | 8.09                | 94.0<br>5         | 47.5<br>5            | 4826<br>1820           | 7.16                      | 96.8<br>1               | 47.<br>43              | 89.44                        | 48261<br>820    | 46410426<br>(96.16) | 4485366<br>2(96.65) | 22426832<br>(50.00) | 22426830<br>(50.00) | 22426831(5<br>0.00)   | 22426831(50<br>.00)    |
| Se-1       | 5343<br>3380     | 8.02                | 93.8<br>1         | 47.6<br>7            | 4747<br>0096           | 7.05                      | 96.7<br>8               | 47.<br>58              | 88.84                        | 47470<br>096    | 45812114<br>(96.51) | 4425080<br>0(96.59) | 22125401<br>(50.00) | 22125399<br>(50.00) | 22125401(5<br>0.00)   | 22125399(50<br>.00)    |

|      |      |      |      |      |      |      |      |     |       |       |          |          |          |          |            |             |
|------|------|------|------|------|------|------|------|-----|-------|-------|----------|----------|----------|----------|------------|-------------|
| Se-2 | 5437 | 8.16 | 93.9 | 47.4 | 4855 | 7.21 | 96.7 | 47. | 89.3  | 48552 | 46437140 | 4457712  | 22288564 | 22288559 | 22288561(5 | 22288562(50 |
|      | 3584 |      | 6    | 6    | 2904 |      | 8    | 35  |       | 904   | (95.64)  | 3(95.99) | (50.00)  | (50.00)  | 0.00)      | .00)        |
| Se-3 | 5204 | 7.81 | 93.4 | 47.3 | 4586 | 6.82 | 96.6 | 47. | 88.13 | 45862 | 44065358 | 4280509  | 21402546 | 21402544 | 21402544(5 | 21402546(50 |
|      | 0458 |      | 6    | 9    | 2352 |      | 2    | 31  |       | 352   | (96.08)  | 0(97.14) | (50.00)  | (50.00)  | 0.00)      | .00)        |

---
