# Supplementary material for: Transcriptome Analysis Reveals the Mechanism of Exogenous Selenium in Alleviating Cadmium Stress in Purple Flowering Stalks (Brassica campestris var. purpuraria)
Source: MDPI journal article supplement (doi:10.3390/ijms25031800), 2024-02-01
Supplement: s1 [file s1]

Table S1 Physiological parameters in Purple Flowering Stalks leaves with cadmium treatment and Se pretreatment

| Treatments     | height (cm) | root length (cm) | Shoot fresh weight (g) | root fresh weight (g) | Fv/Fm       | Y (II)      | ETR            | NPQ          | Pn (μmol CO <sub>2</sub> m <sup>-2</sup> s <sup>-1</sup> ) | GS (μmol CO <sub>2</sub> m <sup>-2</sup> s <sup>-1</sup> ) | Ci (μmol CO <sub>2</sub> m <sup>-2</sup> s <sup>-1</sup> ) | Tr (μmol CO <sub>2</sub> m <sup>-2</sup> s <sup>-1</sup> ) | Chla content (mg/g FW) | Chlb content (mg/g FW) | Car content (mg/g FW) | total chl content (mg/g FW) | MDA (nmol/g) | SOD (U/g FW)   | POD (U/g FW)    | CAT (U/g FW)     |
|----------------|-------------|------------------|------------------------|-----------------------|-------------|-------------|----------------|--------------|------------------------------------------------------------|------------------------------------------------------------|------------------------------------------------------------|------------------------------------------------------------|------------------------|------------------------|-----------------------|-----------------------------|--------------|----------------|-----------------|------------------|
| CK             | 11.8±0.20 a | 18.23±1.72 a     | 6.64±1.06 a            | 1.41±0.08 a           | 0.82±0.01 a | 0.67±0.01 a | 246.57±5.29 a  | 0.44±0.01 bc | 20.78±0.81 a                                               | 0.46±0.01 a                                                | 281.75±3.86 c                                              | 3.35±0.0 a                                                 | 9.61±0.64 a            | 3.58±0.23 a            | 0.77±0.08 a           | 13.19±0.87 a                | 10.72±0.96 c | 147.29±12.32 a | 570.87±76.39 a  | 1854.0±83.2 4 a  |
| CdCK           | 3.83±0.25 e | 6.30±0.69 d      | 0.88±0.17 d            | 0.27±0.04 d           | 0.33±0.14 b | 0.12±0.02 d | 37.60±9.96 c   | 0.75±0.09 a  | 3.35±0.38 e                                                | 0.17±0.01 c                                                | 355.74±6.85 a                                              | 2.01±0.05 c                                                | 1.85±0.12 c            | 1.10±0.04 c            | 0.06±0.06 c           | 2.95±0.16 d                 | 20.07±0.76 a | 63.07±15.58 d  | 298.50±31.43 d  | 874.94±90.14 d   |
| T1(10 μmol/L)  | 4.57±0.15 d | 9.43±0.55 c      | 1.45±0.30 cd           | 0.36±0.07 cd          | 0.34±0.07 b | 0.22±0.03 d | 47.80±11.80 c  | 0.52±0.08 b  | 6.77±0.36 d                                                | 0.19±0.02 c                                                | 313.25±8.32 b                                              | 2.14±0.35 c                                                | 2.16±0.42 c            | 1.22±0.26 c            | 0.16±0.02 bc          | 3.38±0.67 cd                | 15.06±0.24 b | 99.66±5.14 c   | 387.50±54.49 cd | 1279.1±104.0 8 c |
| T2(50 μmol/L)  | 5.53±0.35 c | 11.77±1.00 c     | 2.37±0.27 bc           | 0.49±0.08 bc          | 0.77±0.02 a | 0.37±0.07 c | 188.27±20.28 b | 0.43±0.08 bc | 9.77±0.94 c                                                | 0.2±0.01 c                                                 | 308.77±8.41 b                                              | 2.42±0.26 c                                                | 2.77±0.57 c            | 1.47±0.09 bc           | 0.21±0.07 b           | 4.24±0.54 c                 | 9.49±1.57 c  | 124.18±10.69 b | 462.50±66.14 bc | 1508.2±140. 49 b |
| T3(250 μmol/L) | 6.97±0.38 b | 15.33±2.48 b     | 2.65±0.20 b            | 0.62±0.10 b           | 0.80±0.01 a | 0.52±0.09 b | 193.67±28.40 b | 0.32±0.09 c  | 13.61±1.16 b                                               | 0.24±0.02 b                                                | 277.47±6.08 c                                              | 2.89±0.17 b                                                | 4.29±0.57 b            | 1.84±0.28 b            | 0.25±0.05 b           | 6.13±0.85 b                 | 7.17±1.05 d  | 138.85±6.42 ab | 555.00±26.46 ab | 1833.2±113. 42 a |
