# Supplementary material for: Transcriptome Analysis Reveals the Mechanism of Exogenous Selenium in Alleviating Cadmium Stress in Purple Flowering Stalks (Brassica campestris var. purpuraria)
Source: MDPI journal article supplement (doi:10.3390/ijms25031800), 2024-02-01
Supplement: s1 [file s1]

**Table S4 Primer sequences used in this study for qRT-PCR**

| <b>Gene ID</b>              | <b>Gene name</b> | <b>Forward primer sequence (5'-3')</b> | <b>Reverse primer sequence (5'-3')</b> |
|-----------------------------|------------------|----------------------------------------|----------------------------------------|
| BraA05g02<br>7600.3C        | <i>BCAT4</i>     | ATTATCGCTACAGGGTGT<br>ACTG             | ATCTGCAACCTCCCGAATA<br>TAG             |
| BraA06g01<br>2350.3C        | <i>CYP79F1</i>   | CAGTTTGGGGAGATTTTG<br>GAAG             | AGGTTGCAATTTGCTCTTCT<br>TC             |
| BraA04g02<br>9510.3C        | <i>CYP83A1</i>   | TCTTTTACATCTTCACCGT<br>GGA             | CTGTGTTTTGCTAGCTTTC<br>TT              |
| BraA03g02<br>0140.3C        | <i>WRKY33</i>    | TTTGTTTGCTGAAGAAGT<br>CACC             | CTTCGGTGTGCGTAATCAAT<br>CAC            |
| BraA04g02<br>2100.3C        | <i>GST</i>       | TAGCTTTGGTGTGTGCTT<br>TAC              | GCAAATATCAGCCAATTTT<br>GCC             |
| <i>BraA09g021</i><br>180.3C | <i>CYP707A</i>   | ATCTGATGAATTCTTGAG<br>GGCA             | GAATTTGAGATGCCCTAAC<br>GTC             |
| BraA01g01<br>3470.3C        | <i>ANS</i>       | ACGGCGATAACAAGAGA<br>GTAA              | GAATAAGTCGAAGATGCGT<br>TGG             |
| BraA03g03<br>4380.3C        | <i>sir</i>       | TCGGATCGAATACTCTGA<br>CAAG             | ATGAATAGCGTAATGGACC<br>CAT             |
| BraA08g00<br>9680.3C        | <i>SELENBP1</i>  | CGATCAATGCACCTTACA<br>GGAAG            | CACAAGCAAAGGTTATGCA<br>GAT             |
| BraA01g00<br>4020.3C        | <i>ALDH</i>      | GATGTTCAACGGATTCTA<br>CAGC             | ACAATGTGCTGGATCATAG<br>TGA             |
| BraA01g02<br>8620.3C        | <i>petF</i>      | ATACGCTACGTCAAGTTC<br>TTGA             | GAAATCCATGACGTCTTCA<br>TCG             |
| BraA09g02<br>9800.3C        | <i>ATPF1D</i>    | AACCTGAGATCAAAGTG<br>CCTTA             | CACAGCAATGACACTTGTT<br>GTA             |
| BraA07g01<br>0120.3C        | <i>psaF</i>      | GAAGGATAAGAACGAGG<br>ACGAT             | TGGATCTTCTTGTCTTCAG<br>GG              |
| BraA07g03<br>1170.3C        | <i>psbY</i>      | CTACCTGGAAGCTGTTTC<br>AGTA             | CCTCCGAAAACACTTTTAA<br>CGT             |
| BraA01g00<br>8860.3C        | <i>psb28</i>     | ATGGACCTGTACTGAAC<br>CAATT             | AGCTCCAACAGAACTCTA<br>CTC              |
| BraA02g02<br>5510.3C        | <i>WRKY40</i>    | ACTTGAAGAATCTCGCTC<br>TCTG             | ATCAGGATCATGAGGAATG<br>TCG             |
| BraA07g03<br>8080.3C        | <i>SOT16</i>     | AATTTCAAGATTCTGCCC<br>ATCG             | CGGTTGAATCCGTCTTTGTA<br>TC             |
| BraA04g01<br>7740.3C        | <i>CARP</i>      | GATCCCTGAGTTGAAGC<br>ACTAT             | TTGTGATTTTGAAGAGCAC<br>TCG             |
|                             | <i>braActin</i>  | CGGTGTCATGGTTGGGA<br>GA                | CGTGCTCGATGGGGTACTT<br>C               |
